# Supplementary material
Source: Research Square preprint supplement (doi:10.21203/rs.3.rs-9452188/v1)
Supplement: Supplementary file 1 [file 83b31a33b6b889aa813768fa.pdf]

## Figure S1. User Interface

AtlasAI deployed as an integrated sidebar on the Human Protein Atlas website, streaming all reasoning steps in real time. (A) Deep Research panel displaying the complete auditable trace for "Find kinases enriched in brain tissue but not secreted to blood": goal parsing, field and class selection with available options shown, subclass selection, trail navigation through the HPA schema, URL construction, semantic validation (PASS), and final results (8 kinases). (B) Investigator panel showing autonomous gene exploration for "Is ABCB11 cancer prognostic": gene resolution, page selection, HTML download (308KB), chart and table extraction (5 charts, 7 tables), evidence observation, value identification with source section, reasoning chain, validation (3/3 checks passed, HIGH confidence), and grounded answer with citations.

### A

Find kinases enriched in brain tissue but not secreted to blood

12:18 AM

I will start by searching for kinases that are enriched in brain tissue and then filter out those that are secreted to blood.

12:18 AM

Deep Research complete ▾

Thinking in choice... + deep\_research\_hpa

**THINK** Field Options

Analyzing options... + deep\_research\_hpa

**SELECT** Field

Analyzing options... + deep\_research\_hpa

**THINK** Class Options

Analyzing options... + deep\_research\_hpa

**SELECT** Class

Analyzing options... + deep\_research\_hpa

**RUN** Path

Executing query... + deep\_research\_hpa

**PLAN** Axis Built

Building search strategy... + deep\_research\_hpa

**THINK** Subclass Options

Analyzing options... + deep\_research\_hpa

**SELECT** Subclass

Analyzing options... + deep\_research\_hpa

**RUN** Path

Executing query... + deep\_research\_hpa

**PLAN** Axis Built

Building search strategy... + deep\_research\_hpa

**THINK** Note

Analyzing options... + deep\_research\_hpa

**RUN** Path

Executing query... + deep\_research\_hpa

**PLAN** Axis Built

Building search strategy... + deep\_research\_hpa

**PLAN** Validation

Building search strategy... + deep\_research\_hpa

**RUN** Url Ready

Executing query... + deep\_research\_hpa

**PLAN** Validate

Building search strategy... + deep\_research\_hpa

**DONE** Valid

Research complete... + deep\_research\_hpa

**PLAN** Search

Executing compound query

I found 8 kinases enriched in brain tissue that are not secreted to blood. The results match the exact search criteria provided.

12:19 AM

Filter 8 genes...

| GENE                                                                                                 | TISSUE | BRAIN | SINGLE CELL | SUBCELL | CANCER | BLOOD | CELL LINE | STRUCTURE |
|------------------------------------------------------------------------------------------------------|--------|-------|-------------|---------|--------|-------|-----------|-----------|
| <b>CAMKK2</b> <small>ENSG00000109131</small><br>Calcium/calmodulin dependent protein kinase kinase 2 |        |       |             |         |        |       |           |           |
| <b>CAMKV</b> <small>ENSG00000144876</small><br>CaM kinase like vesicle associated                    |        |       |             |         |        |       |           |           |
| <b>EPHA5</b> <small>ENSG00000145242</small><br>EPH receptor A5                                       |        |       |             |         |        |       |           |           |
| <b>FGFR2</b> <small>ENSG00000024248</small><br>Fibroblast growth factor receptor 2                   |        |       |             |         |        |       |           |           |
| <b>HRK2</b> <small>ENSG00000146393</small><br>Homeodomain interacting protein kinase 2               |        |       |             |         |        |       |           |           |

Prev 1 / 2 Next

### B

Is ABCB11 cancer prognostic

12:26 AM

I will look up detailed information about the prognostic value of ABCB11 in cancer.

12:26 AM

Investigator complete ▾

START Investigating Gene

Resolving gene in HPA...

Research agent activated... + investigator\_hpa

SELECT Resolved

Analyzing options... + investigator\_hpa

LOCKING IN CHOICE... + investigator\_hpa

PLAN Selecting

Determining which pages to fetch...

Building search strategy... + investigator\_hpa

PLAN Pages

cancer

Building search strategy... + investigator\_hpa

INFO Page Select

297 (255 in + 42 out)

investigator\_hpa

RUN Fetching

cancer

Executing query... + investigator\_hpa

INFO Downloaded

308KB HTML

Status update... + investigator\_hpa

INFO Charts

5 found

Status update... + investigator\_hpa

INFO Tables

7 found

Status update... + investigator\_hpa

INFO Analyzing

11.8KB data, 7 tables

Status update... + investigator\_hpa

INFO Observed

The CHART DATA section explicitly states: "Liver Hepatocellular Carcinoma - Potential prognostic - favorable; present."

Status update... + investigator\_hpa

INFO Observed

The PROGNOSTIC SUMMARY section confirms ABCB11 as a prognostic marker with Kaplan-Meier plots for cancers where high expression is significantly associated with survival.

Status update... + investigator\_hpa

INFO Observed

No other cancers are mentioned as prognostic for ABCB11 in the extracted data.

Status update... + investigator\_hpa

INFO Value Found

Liver Hepatocellular Carcinoma - Potential prognostic - favorable

Status update... + investigator\_hpa

INFO From Section

CANCER PAGE - CHART DATA and PROGNOSTIC SUMMARY

Status update... + investigator\_hpa

INFO Logic

The data explicitly states ABCB11 is a prognostic marker in liver hepatocellular carcinoma with a favorable prognosis, directly answering the question about cancer prognostic status.

Status update... + investigator\_hpa

INFO Reasoning

4839 (4582 in + 257 out)

investigator\_hpa

INFO Total

5136 (4837 in + 299 out)

investigator\_hpa

INFO Checking

Validating answer quality...

Status update... + investigator\_hpa

INFO Answer Found

Status update... + investigator\_hpa

INFO Source Identified

CANCER PAGE - CHART DATA and PROGNOSTIC SUMMARY

Status update... + investigator\_hpa

INFO Confidence

HIGH

Status update... + investigator\_hpa

INFO Result

3/3 checks passed

Status update... + investigator\_hpa

Here's what I found about ABCB11:

ABCB11 is a prognostic marker in Liver Hepatocellular Carcinoma with a potential favorable prognosis.

This is based on data that explicitly states ABCB11 is a prognostic marker in liver hepatocellular carcinoma with a favorable prognosis. The CHART DATA section explicitly states: "Liver Hepatocellular Carcinoma - Potential prognostic - favorable; present." The PROGNOSTIC SUMMARY section confirms ABCB11 as a prognostic marker with Kaplan-Meier plots for cancers where high expression is significantly associated with survival. No other cancers are mentioned as prognostic for ABCB11 in the extracted data.

12:26 AM

**Table S1. 17-Query Curated Benchmark Results**

Ground truth established through expert manual navigation by three researchers with extensive HPA experience. Accuracy scored as correct if system outputs matched ground truth URLs (searches) or returned accurate values with valid citations (investigations).

| #                             | CATEGORY      | QUERY                                              | RESULT  | STEPS | TIME (S) | ATTEMPTS                                      |
|-------------------------------|---------------|----------------------------------------------------|---------|-------|----------|-----------------------------------------------|
| 1                             | Simple        | Find all proteases                                 | Correct | 9     | 11.8     | 1                                             |
| 2                             | Simple        | Show me voltage-gated ion channels                 | Correct | 11    | 12.3     | 1                                             |
| 3                             | Simple        | Find all kinases                                   | Correct | 9     | 11.2     | 1                                             |
| 4                             | Compound      | Transcription factors enriched in testis           | Correct | 18    | 13.8     | 1                                             |
| 5                             | Compound      | Membrane receptors highly expressed in brain       | Correct | 21    | 14.7     | 2 (recovered)                                 |
| 6                             | Compound      | Liver-enriched secreted proteins                   | Correct | 23    | 15.1     | 2 (recovered)                                 |
| 7                             | Compound      | Kidney enriched NOT liver                          | Correct | 18    | 13.2     | 1                                             |
| 8                             | Exclusion     | Kinases not expressed in heart tissue              | Correct | 26    | 17.3     | 2 (recovered)                                 |
| 9                             | Exclusion     | Receptors enriched in lung but absent from liver   | Correct | 28    | 18.9     | 2 (recovered)                                 |
| 10                            | Exclusion     | Proteins not secreted to blood                     | Correct | 22    | 15.8     | 1                                             |
| 11                            | Exclusion     | Cancer-associated transporters not in normal colon | Correct | 24    | 16.1     | 1                                             |
| 12                            | Investigation | What tissues express EGFR?                         | Correct | 11    | 7.2      | 1                                             |
| 13                            | Investigation | How many protein interactions does EGFR have?      | Correct | 16    | 9.4      | 1                                             |
| 14                            | Investigation | Is MYC prognostic in any cancer type?              | Correct | 19    | 11.8     | 1                                             |
| 15                            | Investigation | What is the subcellular location of TP53?          | Correct | 14    | 8.6      | 1                                             |
| 16                            | Education     | What IHC markers diagnose melanoma?                | Correct | 8     | 5.4      | 1                                             |
| 17                            | Education     | Show normal liver histology                        | Correct | 6     | 4.2      | 1                                             |
| <b>Accuracy: 17/17 (100%)</b> |               |                                                    |         |       |          | <b>4 queries required validation recovery</b> |

## Table S2. Time Efficiency: Manual Expert vs. AtlasAI

Manual times measured with three expert users familiar with HPA structure (median of 5 trials each). "Manual Clicks" indicates discrete interface actions. "Agent Steps" indicates logged reasoning operations.

| QUERY                            | CATEGORY      | MANUAL (S) | ATLASAI (S) | SPEEDUP | CLICKS | STEPS |
|----------------------------------|---------------|------------|-------------|---------|--------|-------|
| Find all proteases               | Simple        | 34         | 11.8        | 2.9x    | 4      | 9     |
| Voltage-gated ion channels       | Simple        | 41         | 12.3        | 3.3x    | 5      | 11    |
| TFs enriched in testis           | Compound      | 118        | 13.8        | 8.6x    | 9      | 18    |
| Membrane receptors in brain      | Compound      | 134        | 14.7        | 9.1x    | 11     | 21    |
| Liver-enriched secreted proteins | Compound      | 142        | 15.1        | 9.4x    | 12     | 23    |
| Kinases not in heart             | Exclusion     | 167        | 17.3        | 9.7x    | 14     | 26    |
| Receptors in lung not liver      | Exclusion     | 189        | 18.9        | 10.0x   | 18     | 28    |
| What tissues express EGFR?       | Investigation | 38         | 7.2         | 5.3x    | 3      | 11    |
| EGFR protein interactions        | Investigation | 52         | 9.4         | 5.5x    | 4      | 16    |
| Is MYC prognostic?               | Investigation | 68         | 11.8        | 5.8x    | 6      | 19    |

### Summary by Category

| CATEGORY      | MEAN MANUAL (S) | MEAN ATLASAI (S) | MEAN SPEEDUP |
|---------------|-----------------|------------------|--------------|
| Simple        | 37.5            | 12.1             | 3.1x         |
| Compound      | 131.3           | 14.5             | 9.0x         |
| Exclusion     | 178.0           | 18.1             | 9.8x         |
| Investigation | 52.7            | 9.5              | 5.5x         |

Speedup increases with query complexity due to compounding navigation overhead in manual approach.

## Benchmark Protocol for Frontier Language Model Comparison

**Prompting setup.** All 30 queries were presented to each model in separate independent sessions. The prompt identified the Human Protein Atlas (proteintlas.org) as the authoritative data source and instructed each model to provide the complete list of matching genes, the count, and a confidence level for each query. No HPA schema information, URL syntax, or worked examples were provided. All models had web browsing enabled at the time of evaluation. Baseline models were evaluated without access to the HPA schema, reflecting standard usage without task-specific system integration.

**Model configurations.** Six configurations were tested: Claude Opus 4.6 with extended thinking (Anthropic, \$5.00/\$25.00 per 1M input/output tokens), Gemini 3.1 Pro with thinking (Google, \$2.00/\$12.00), GPT-5.4 at high reasoning effort (\$2.50/\$15.00), GPT-5.4 at medium reasoning effort (\$2.50/\$15.00), GPT-5.4 with no reasoning (\$2.50/\$15.00), and GPT-4.1 with no reasoning (OpenAI, \$2.00/\$8.00). AtlasAI uses GPT-4.1 mini (\$0.40/\$1.60) as its backbone model. All pricing as of March 2026.

**Retries and reformulation.** No retries were permitted. Each model received one attempt per query. Models were free to use web browsing, search, and any other tools available in their standard configuration. No time limit was imposed; models were allowed to run until they produced a final answer or explicitly declined.

**Definition of "Refused."** A model was scored as "Refused" when it explicitly stated that it could not reliably complete the task. In practice, Claude Opus 4.6 and GPT-5.4 attempted to access HPA through web browsing, tried multiple strategies (direct page fetching, API endpoints, bulk data downloads), and after failing to navigate the search system, returned a statement declining to provide answers rather than risk fabrication. This behavior was consistent across all three GPT-5.4 reasoning levels.

**Correctness threshold.** A model's reported gene count was scored as correct if it fell within 10% of the ground truth count (verified against live HPA search results). For queries returning zero results, any non-zero answer was scored as incorrect.

**Atlas Cost Index (ACI).** ACI was computed as the estimated API cost per query for each model divided by the AtlasAI cost per query. Token consumption was estimated at 80,000 to 120,000 tokens per model based on observed prompt lengths, browsing overhead, and reasoning token generation. AtlasAI cost was computed from its average token consumption (~7,500 tokens) at GPT-4.1 mini rates.

**Table S3. Full 30-Query LLM Comparison**

Extended version of Figure 2A. All models given web browsing access. Correctness threshold: ±10% of actual count. ACI = Atlas Cost Index (API cost relative to AtlasAI baseline).

| #  | QUERY                                                        | TRUTH | ATLASAI | CLAUDE 4.6 | GEMINI 3.1 PRO | GPT-5.4 HIGH | GPT-5.4 MED | GPT-5.4 | GPT-4.1 |
|----|--------------------------------------------------------------|-------|---------|------------|----------------|--------------|-------------|---------|---------|
| 1  | Prognostic markers in melanoma                               | 254   | 254 ✓   | Refused    | >1500 ✗        | Refused      | Refused     | Refused | Refused |
| 2  | Proteins specific to placenta, secreted to blood             | 10    | 10 ✓    | Refused    | ~25 ✗          | Refused      | Refused     | Refused | Refused |
| 3  | Metabolic proteins enriched only in liver                    | 107   | 107 ✓   | Refused    | ~175 ✗         | Refused      | Refused     | Refused | Refused |
| 4  | Fibroblast enriched predicted secreted proteins              | 5     | 5 ✓     | Refused    | ~60 ✗          | Refused      | Refused     | Refused | Refused |
| 5  | Predicted secreted proteins in pituitary                     | 12    | 12 ✓    | Refused    | ~20 ✗          | Refused      | Refused     | Refused | Refused |
| 6  | Kinases in thyroid, not secreted to blood                    | 0     | 0 ✓     | Refused    | 0 ✓            | Refused      | Refused     | Refused | Refused |
| 7  | Nuclear proteins in testis, not in liver                     | 188   | 188 ✓   | Refused    | ~400 ✗         | Refused      | Refused     | Refused | Refused |
| 8  | Hepatocyte kinases, secreted to blood                        | 0     | 0 ✓     | Refused    | 0 ✓            | Refused      | Refused     | Refused | Refused |
| 9  | Cardiomyocyte enzymes, not secreted                          | 3     | 3 ✓     | Refused    | ~30 ✗          | Refused      | Refused     | Refused | Refused |
| 10 | Enzymes in hypothalamus, not secreted                        | 1     | 1 ✓     | Refused    | <5 ✗           | Refused      | Refused     | Refused | Refused |
| 11 | Peroxisome proteins in liver, not kidney                     | 0     | 0 ✓     | Refused    | 1-3 ✗          | Refused      | Refused     | Refused | Refused |
| 12 | Mitochondrial kinases in heart                               | 0     | 0 ✓     | Refused    | 1 ✗            | Refused      | Refused     | Refused | Refused |
| 13 | Proteases in pancreas, secreted digestive                    | 14    | 14 ✓    | Refused    | ~15 ✓          | Refused      | Refused     | Refused | Refused |
| 14 | Cell junction proteins in colon, not liver                   | 1     | 1 ✓     | Refused    | ~10 ✗          | Refused      | Refused     | Refused | Refused |
| 15 | Lysosome proteins in spleen, not brain                       | 0     | 0 ✓     | Refused    | ~5 ✗           | Refused      | Refused     | Refused | Refused |
| 16 | FDA kinases in brain, not liver                              | 2     | 2 ✓     | Refused    | 1-2 ✓          | Refused      | Refused     | Refused | Refused |
| 17 | CD markers in T-cells, not B/NK-cells                        | 25    | 25 ✓    | Refused    | 6 ✗            | Refused      | Refused     | Refused | Refused |
| 18 | Enzymes in stomach, absent liver/pancreas                    | 1     | 1 ✓     | Refused    | ~8 ✗           | Refused      | Refused     | Refused | Refused |
| 19 | Cancer metabolic proteins in liver, not kidney               | 7     | 7 ✓     | Refused    | ~2 ✗           | Refused      | Refused     | Refused | Refused |
| 20 | Metabolic enzymes in cerebellum, not cortex                  | 6     | 6 ✓     | Refused    | 0 ✗            | Refused      | Refused     | Refused | Refused |
| 21 | Kinases in thalamus, not hypothalamus/cortex                 | 0     | 0 ✓     | Refused    | 0 ✓            | Refused      | Refused     | Refused | Refused |
| 22 | FDA membrane proteins in brain, not secreted                 | 40    | 40 ✓    | Refused    | ~45 ✓          | Refused      | Refused     | Refused | Refused |
| 23 | Cancer transporters in brain, not liver                      | 3     | 3 ✓     | Refused    | <5 ✗           | Refused      | Refused     | Refused | Refused |
| 24 | Peptidases in stomach, not liver/brain, not secreted         | 2     | 2 ✓     | Refused    | 4 ✗            | Refused      | Refused     | Refused | Refused |
| 25 | Kinases in retina, not cortex/liver, not secreted            | 4     | 4 ✓     | Refused    | 2 ✗            | Refused      | Refused     | Refused | Refused |
| 26 | Cancer transporters in liver, not kidney/brain, not secreted | 0     | 0 ✓     | Refused    | 1-2 ✗          | Refused      | Refused     | Refused | Refused |
| 27 | TFs in testis, not brain/liver/ovary/prostate                | 24    | 24 ✓    | Refused    | 1-3 ✗          | Refused      | Refused     | Refused | Refused |
| 28 | Kinases in brain, not liver/heart/kidney, not secreted       | 4     | 4 ✓     | Refused    | ~5 ✗           | Refused      | Refused     | Refused | Refused |
| 29 | Enzymes in hepatocytes, not brain/kidney, not secreted       | 14    | 14 ✓    | Refused    | ~10 ✗          | Refused      | Refused     | Refused | Refused |
| 30 | FDA targets in brain, not liver/kidney/heart, not secreted   | 31    | 31 ✓    | Refused    | ~17 ✗          | Refused      | Refused     | Refused | Refused |

"Refused" = model attempted to access HPA through web browsing but could not navigate the search system and explicitly declined to provide answers. Gemini 3.1 Pro hallucinated gene counts for 4 queries where HPA returns 0 results. API pricing as of March 2026.

### Accuracy Summary

| MODEL                  | REASONING        | ACCURACY     | ACI  | \$/QUERY |
|------------------------|------------------|--------------|------|----------|
| AtlasAI (GPT-4.1 mini) | 5-stage pipeline | 100% (30/30) | 1.0x | \$0.005  |
| Claude Opus 4.6        | Extended         | 0% (0/30)    | 240x | \$1.20   |
| Gemini 3.1 Pro         | Thinking         | 20% (6/30)   | 86x  | \$0.43   |
| GPT-5.4                | High             | 0% (0/30)    | 124x | \$0.62   |
| GPT-5.4                | Medium           | 0% (0/30)    | 78x  | \$0.39   |
| GPT-5.4                | None             | 0% (0/30)    | 56x  | \$0.28   |



**Table S4. Extended 236-Query Deep Research Benchmark (full results)**

All queries verified against live HPA search results. Individual execution logs for all 236 queries available in supplementary data archive.

**Summary**

| TIER         | CONSTRAINTS | COUNT      | AVG TIME (S) | FIRST ATTEMPT |
|--------------|-------------|------------|--------------|---------------|
| 1-axis       | 1           | 9          | 12.5         | 100%          |
| 2-axis       | 2           | 28         | 11.4         | 96%           |
| 3-axis       | 3           | 130        | 13.2         | 95%           |
| 4-axis       | 4           | 32         | 16.7         | 94%           |
| 5+ axis      | 5-6         | 37         | 16.0         | 95%           |
| <b>Total</b> |             | <b>236</b> | <b>13.9</b>  | <b>95.8%</b>  |

77% of queries include at least one exclusion constraint. All 236 correct URLs verified against live HPA.

**Per-Query Results**

| #  | AXES | QUERY                                                                                                 | GENES | TIME (S) | ATT. | URL                                                                                                                                                                                                                                                               |
|----|------|-------------------------------------------------------------------------------------------------------|-------|----------|------|-------------------------------------------------------------------------------------------------------------------------------------------------------------------------------------------------------------------------------------------------------------------|
| 1  | 5    | Peptidases enriched in stomach not detected in liver or brain and not secreted to blood               | 2     | 14.7     | 1    | protein_class:Enzymes:Peptidases+AND+tissue_category_rna:Stomach:Tissue+enriched+AND+tissue_category_rna:Liver:Not+detected+AND+tissue_category_rna:Brain:Not+detected+NOT+sa_location:Secreted+to+blood                                                          |
| 2  | 5    | Transcription factors enriched in cerebral cortex not in cerebellum not in liver and not in kidney    | 1     | 15.1     | 1    | protein_class:Transcription+factors+AND+brain_category_rna:Cerebral+cortex:Region+enriched+AND+brain_category_rna:Cerebellum:Not+detected+AND+tissue_category_rna:Liver:Not+detected+AND+tissue_category_rna:Kidney:Not+detected                                  |
| 3  | 5    | Predicted secreted proteins enriched in placenta not in ovary not in testis and secreted to blood     | 6     | 14.8     | 1    | protein_class:Predicted+secreted+proteins+AND+tissue_category_rna:Placenta:Tissue+enriched+AND+tissue_category_rna:Ovary:Not+detected+AND+tissue_category_rna:Testis:Not+detected+AND+sa_location:Secreted+to+blood                                               |
| 4  | 5    | Enzymes enriched in adrenal gland not in kidney not in liver and not secreted to extracellular matrix | 2     | 14.2     | 1    | protein_class:Enzymes+AND+tissue_category_rna:Adrenal:gland:Tissue+enriched+AND+tissue_category_rna:Kidney:Not+detected+AND+tissue_category_rna:Liver:Not+detected+NOT+sa_location:Secreted+to+extracellular+matrix                                               |
| 5  | 5    | CD markers enriched in spleen not in brain not in testis and not in liver                             | 13    | 14.5     | 1    | protein_class:CD+markers+AND+tissue_category_rna:Lymphoid:Tissue+enriched+AND+tissue_category_rna:Brain:Not+detected+AND+tissue_category_rna:Testis:Not+detected+AND+tissue_category_rna:Liver:Not+detected                                                       |
| 6  | 5    | Kinases enriched in retina not in cerebral cortex not in liver and not secreted to blood              | 4     | 15.8     | 1    | protein_class:Enzymes:Kinases+AND+tissue_category_rna:Retina:Tissue+enriched+AND+brain_category_rna:Cerebral+cortex:Not+detected+AND+tissue_category_rna:Liver:Not+detected+NOT+sa_location:Secreted+to+blood                                                     |
| 7  | 5    | Transporters enriched in colon not in small intestine not in stomach and not in liver                 | 46    | 46.5     | 4    | protein_class:Transporters+AND+ce_enriched:Colon:Colon+enterocytes,Colon+enteroendocrine+cells,Mitotic+cells+(Colon)+AND+tissue_category_rna:Intestine:Not+detected+AND+tissue_category_rna:Stomach:Not+detected+AND+tissue_category_rna:Liver:Not+detected       |
| 8  | 5    | Nuclear receptors enriched in liver not in kidney not in adrenal gland and not in brain               | 0     | 14.4     | 1    | protein_class:Nuclear+receptors+AND+tissue_category_rna:Liver:Tissue+enriched+AND+tissue_category_rna:Kidney:Not+detected+AND+tissue_category_rna:Adrenal:gland:Not+detected+AND+tissue_category_rna:Brain:Not+detected                                           |
| 9  | 5    | Metabolic proteins enriched in skeletal muscle not in heart muscle not in brain and not in liver      | 1     | 12.9     | 1    | protein_class:Metabolic+proteins+AND+tissue_category_rna:Skeletal+muscle:Tissue+enriched+AND+tissue_category_rna:Heart+muscle:Not+detected+AND+tissue_category_rna:Brain:Not+detected+AND+tissue_category_rna:Liver:Not+detected                                  |
| 10 | 5    | Ribosomal proteins enriched in testis not in ovary not in brain and not in bone marrow                | 1     | 14.3     | 1    | protein_class:Ribosomal+proteins+AND+tissue_category_rna:Testis:Tissue+enriched+AND+tissue_category_rna:Ovary:Not+detected+AND+tissue_category_rna:Brain:Not+detected+AND+tissue_category_rna:Bone+marrow:Not+detected                                            |
| 11 | 5    | Predicted membrane proteins enriched in lung not in heart not in brain and not secreted to blood      | 4     | 16.4     | 1    | protein_class:Predicted+membrane+proteins+AND+tissue_category_rna:Lung:Tissue+enriched+AND+tissue_category_rna:Heart+muscle:Not+detected+AND+tissue_category_rna:Brain:Not+detected+NOT+sa_location:Secreted+to+blood                                             |
| 12 | 5    | FDA approved drug targets enriched in kidney not in liver not in brain and not in heart               | 10    | 13.9     | 1    | protein_class:FDA+approved+drug+targets+AND+tissue_category_rna:Kidney:Tissue+enriched+NOT+tissue_category_rna:Liver:Tissue+enriched+NOT+tissue_category_rna:Brain:Tissue+enriched+NOT+tissue_category_rna:Heart+muscle:Tissue+enriched                           |
| 13 | 5    | Cancer-related genes enriched in testis not in ovary not in brain and secreted to blood               | 2     | 13.7     | 1    | protein_class:Cancer-related+genes+AND+tissue_category_rna:Testis:Tissue+enriched+AND+tissue_category_rna:Ovary:Not+detected+AND+tissue_category_rna:Brain:Not+detected+AND+sa_location:Secreted+to+blood                                                         |
| 14 | 4    | Voltage-gated ion channels enriched in brain not in heart not in skeletal muscle                      | 19    | 13.9     | 1    | protein_class:Voltage-gated+ion+channels+AND+tissue_category_rna:Brain:Tissue+enriched+AND+tissue_category_rna:Heart+muscle:Not+detected+AND+tissue_category_rna:Skeletal+muscle:Not+detected                                                                     |
| 15 | 5    | Plasma proteins enriched in liver not in kidney not in brain and secreted to blood                    | 37    | 14.8     | 1    | protein_class:Plasma+proteins+AND+tissue_category_rna:Liver:Tissue+enriched+AND+tissue_category_rna:Kidney:Not+detected+AND+tissue_category_rna:Brain:Not+detected+AND+sa_location:Secreted+to+blood                                                              |
| 16 | 5    | Proteases enriched in stomach not in pancreas not in liver and not in kidney                          | 0     | 13.7     | 1    | protein_class:Enzymes:Peptidases+AND+tissue_category_rna:Stomach:Tissue+enriched+AND+tissue_category_rna:Pancreas:Not+detected+AND+tissue_category_rna:Liver:Not+detected+AND+tissue_category_rna:Kidney:Not+detected                                             |
| 17 | 5    | Immunoglobulin genes enriched in bone marrow not in liver not in brain and not in testis              | 0     | 15.4     | 1    | protein_class:Immunoglobulin+genes+AND+tissue_category_rna:Bone+marrow:Tissue+enriched+AND+tissue_category_rna:Liver:Not+detected+AND+tissue_category_rna:Brain:Not+detected+AND+tissue_category_rna:Testis:Not+detected                                          |
| 18 | 5    | RAS pathway proteins enriched in brain not in liver not in kidney and not in heart                    | 6     | 15.7     | 1    | protein_class:RAS+pathway+related+proteins+AND+tissue_category_rna:Brain:Tissue+enriched+AND+tissue_category_rna:Liver:Not+detected+AND+tissue_category_rna:Kidney:Not+detected+AND+tissue_category_rna:Heart+muscle:Not+detected                                 |
| 19 | 5    | Enzymes enriched in thyroid gland not in parathyroid gland not in adrenal gland and not in liver      | 1     | 15.0     | 1    | protein_class:Enzymes+AND+tissue_category_rna:Thyroid:gland:Tissue+enriched+AND+tissue_category_rna:Parathyroid:gland:Not+detected+AND+tissue_category_rna:Adrenal:gland:Not+detected+AND+tissue_category_rna:Liver:Not+detected                                  |
| 20 | 4    | Transporters enriched in proximal tubule cells not in liver and not secreted to blood                 | 0     | 15.0     | 1    | protein_class:Transporters+AND+cell_type_category_rna:Proximal+tubular+cells:Cell+type+enriched+AND+tissue_category_rna:Liver:Not+detected+NOT+sa_location:Secreted+to+blood                                                                                      |
| 21 | 5    | Kinases enriched in hippocampal formation not in cerebellum not in liver and not in kidney            | 0     | 16.0     | 1    | protein_class:Enzymes:Kinases+AND+brain_category_rna:Hippocampal+formation:Region+enriched+AND+brain_category_rna:Cerebellum:Not+detected+AND+tissue_category_rna:Liver:Not+detected+AND+tissue_category_rna:Kidney:Not+detected                                  |
| 22 | 6    | Transcription factors enriched in testis not in brain not in liver not in ovary and not in prostate   | 24    | 15.6     | 1    | protein_class:Transcription+factors+AND+tissue_category_rna:Testis:Tissue+enriched+AND+tissue_category_rna:Brain:Not+detected+AND+tissue_category_rna:Liver:Not+detected+AND+tissue_category_rna:Ovary:Not+detected+AND+tissue_category_rna:Prostate:Not+detected |
| 23 | 5    | Predicted intracellular proteins enriched in retina not in brain not in liver and not in kidney       | 42    | 14.7     | 1    | protein_class:Predicted+intracellular+proteins+AND+tissue_category_rna:Retina:Tissue+enriched+AND+tissue_category_rna:Brain:Not+detected+AND+tissue_category_rna:Liver:Not+detected+AND+tissue_category_rna:Kidney:Not+detected                                   |

| #  | AXES | QUERY                                                                                                 | GENES | TIME (S) | ATT. | URL                                                                                                                                                                                                                                                                                                                                                                                                                     |
|----|------|-------------------------------------------------------------------------------------------------------|-------|----------|------|-------------------------------------------------------------------------------------------------------------------------------------------------------------------------------------------------------------------------------------------------------------------------------------------------------------------------------------------------------------------------------------------------------------------------|
| 24 | 6    | Cancer-related transporters enriched in liver not in kidney not in brain and not secreted to blood    | 0     | 16.0     | 1    | protein_class:Transporters+AND+protein_class:Cancer-related+genes+AND+tissue_category_rna:Liver;Tissue+enriched+AND+tissue_category_rna:Kidney;Not+detected+AND+tissue_category_rna:Brain;Not+detected+NOT+sa_location:Secreted+to+blood                                                                                                                                                                                |
| 25 | 5    | Enzymes enriched in salivary gland not in pancreas not in stomach and not in liver                    | 1     | 14.8     | 1    | protein_class:Enzymes+AND+tissue_category_rna:Salivary+gland;Tissue+enriched+AND+tissue_category_rna:Pancreas;Not+detected+AND+tissue_category_rna:Stomach;Not+detected+AND+tissue_category_rna:Liver;Not+detected                                                                                                                                                                                                      |
| 26 | 5    | Membrane proteins enriched in cerebellum not in cerebral cortex not in liver and not in heart         | 26    | 14.8     | 1    | protein_class:Predicted+membrane+proteins+AND+brain_category_rna:Cerebellum;Region+enriched+NOT+brain_category_rna:Cerebral+cortex;Region+enriched+NOT+tissue_category_rna:Liver;Tissue+enriched+NOT+tissue_category_rna:Heart+muscle;Tissue+enriched                                                                                                                                                                   |
| 27 | 5    | Metabolic proteins enriched in liver not in kidney not in skeletal muscle and not in heart muscle     | 37    | 14.4     | 1    | protein_class:Metabolic+proteins+AND+tissue_category_rna:Liver;Tissue+enriched+AND+tissue_category_rna:Kidney;Not+detected+AND+tissue_category_rna:Skeletal+muscle;Not+detected+AND+tissue_category_rna:Heart+muscle;Not+detected                                                                                                                                                                                       |
| 28 | 5    | Predicted secreted proteins enriched in breast not in placenta not in ovary and not secreted to blood | 6     | 15.8     | 1    | protein_class:Predicted+secreted+proteins+AND+tissue_category_rna:Breast;Tissue+enriched+NOT+tissue_category_rna:Placenta;Tissue+enriched+NOT+tissue_category_rna:Ovary;Tissue+enriched+Group+enriched+NOT+sa_location:Secreted+to+blood                                                                                                                                                                                |
| 29 | 5    | Nuclear receptors enriched in prostate not in testis not in liver and not in brain                    | 0     | 13.0     | 1    | protein_class:Nuclear+receptors+AND+tissue_category_rna:Prostate;Tissue+enriched+NOT+tissue_category_rna:Testis;Tissue+enriched+NOT+tissue_category_rna:Liver;Tissue+enriched+NOT+tissue_category_rna:Brain;Tissue+enriched                                                                                                                                                                                             |
| 30 | 3    | Kinases enriched in thyroid gland not secreted to blood                                               | 0     | 12.7     | 1    | protein_class:Enzymes;Kinases+AND+tissue_category_rna:Thyroid+gland;Tissue+enriched+NOT+sa_location:Secreted+to+blood                                                                                                                                                                                                                                                                                                   |
| 31 | 3    | Enzymes enriched in epididymis not detected in ovary                                                  | 4     | 12.7     | 1    | protein_class:Enzymes+AND+tissue_category_rna:Epididymis;Tissue+enriched+AND+tissue_category_rna:Ovary;Not+detected                                                                                                                                                                                                                                                                                                     |
| 32 | 3    | Transporters enriched in colon absent from small intestine                                            | 55    | 42.1     | 4    | protein_class:Transporters+AND+ce_enriched:Colon;Colon+enterocytes;Colon+enteroendocrine+cells;Mitotic+cells+(Colon)+AND+tissue_category_rna:Intestine;Not+detected                                                                                                                                                                                                                                                     |
| 33 | 3    | CD markers enriched in spleen not detected in testis                                                  | 25    | 13.2     | 1    | protein_class:CD+markers+AND+tissue_category_rna:Lymphoid;tissue;Tissue+enriched+AND+tissue_category_rna:Testis;Not+detected                                                                                                                                                                                                                                                                                            |
| 34 | 3    | Transcription factors enriched in adrenal gland not in kidney                                         | 2     | 12.4     | 1    | protein_class:Transcription+factors+AND+tissue_category_rna:Adrenal+gland;Tissue+enriched+NOT+tissue_category_rna:Kidney;Tissue+enriched                                                                                                                                                                                                                                                                                |
| 35 | 3    | Nuclear receptors enriched in prostate not in testis                                                  | 0     | 12.1     | 1    | protein_class:Nuclear+receptors+AND+tissue_category_rna:Prostate;Tissue+enriched+NOT+tissue_category_rna:Testis;Tissue+enriched                                                                                                                                                                                                                                                                                         |
| 36 | 3    | Predicted membrane proteins enriched in retina not in brain                                           | 45    | 12.2     | 1    | protein_class:Predicted+membrane+proteins+AND+tissue_category_rna:Retina;Tissue+enriched+NOT+tissue_category_rna:Brain;Tissue+enriched                                                                                                                                                                                                                                                                                  |
| 37 | 3    | Ribosomal proteins enriched in lymphoid tissue not in testis                                          | 0     | 13.2     | 1    | protein_class:Ribosomal+proteins+AND+tissue_category_rna:Lymphoid;tissue;Tissue+enriched+AND+tissue_category_rna:Testis;Not+detected                                                                                                                                                                                                                                                                                    |
| 38 | 3    | Metabolic proteins enriched in thyroid gland not in liver                                             | 3     | 12.9     | 1    | protein_class:Metabolic+proteins+AND+tissue_category_rna:Thyroid+gland;Tissue+enriched+AND+tissue_category_rna:Liver;Not+detected                                                                                                                                                                                                                                                                                       |
| 39 | 4    | Plasma proteins enriched in placenta secreted to blood                                                | 4     | 47.0     | 4    | protein_class:Plasma+proteins+AND+tissue_category_rna:Placenta;Tissue+enriched+AND+sa_location:Secreted+to+blood+NOT+tissue_category_rna:Bone+marrow;Tissue+enriched                                                                                                                                                                                                                                                    |
| 40 | 3    | Proteases enriched in skin not in liver                                                               | 2     | 13.1     | 1    | protein_class:Enzymes;Peptidases+AND+tissue_category_rna:Skin;Tissue+enriched+AND+tissue_category_rna:Liver;Not+detected                                                                                                                                                                                                                                                                                                |
| 41 | 3    | FDA drug targets enriched in heart muscle not in brain                                                | 3     | 12.1     | 1    | protein_class:FDA+approved+drug+targets+AND+tissue_category_rna:Heart+muscle;Tissue+enriched+NOT+tissue_category_rna:Brain;Tissue+enriched                                                                                                                                                                                                                                                                              |
| 42 | 4    | Cancer-related kinases enriched in kidney not in liver                                                | 0     | 13.0     | 1    | protein_class:Enzymes;Kinases+AND+protein_class:Cancer-related+genes+AND+tissue_category_rna:Kidney;Tissue+enriched+NOT+tissue_category_rna:Liver;Tissue+enriched                                                                                                                                                                                                                                                       |
| 43 | 3    | Immunoglobulin genes enriched in spleen not in liver                                                  | 8     | 13.9     | 1    | protein_class:Immunoglobulin+genes+AND+tissue_category_rna:Lymphoid;tissue;Tissue+enriched+NOT+tissue_category_rna:Liver;Tissue+enriched                                                                                                                                                                                                                                                                                |
| 44 | 3    | Voltage-gated ion channels enriched in heart not in brain                                             | 1     | 14.0     | 1    | protein_class:Voltage-gated+ion+channels+AND+tissue_category_rna:Heart+muscle;Tissue+enriched+AND+tissue_category_rna:Brain;Not+detected                                                                                                                                                                                                                                                                                |
| 45 | 3    | RAS pathway proteins enriched in pancreas not in liver                                                | 0     | 13.5     | 1    | protein_class:RAS+pathway+related+proteins+AND+tissue_category_rna:Pancreas;Tissue+enriched+AND+tissue_category_rna:Liver;Not+detected                                                                                                                                                                                                                                                                                  |
| 46 | 3    | Predicted intracellular proteins enriched in cerebellum not in liver                                  | 30    | 12.2     | 1    | protein_class:Predicted+intracellular+proteins+AND+brain_category_rna:Cerebellum;Region+enriched+AND+tissue_category_rna:Liver;Not+detected                                                                                                                                                                                                                                                                             |
| 47 | 3    | Enzymes enriched in gallbladder not secreted to blood                                                 | 1     | 12.4     | 1    | protein_class:Enzymes+AND+tissue_category_rna:Gallbladder;Tissue+enriched+NOT+sa_location:Secreted+to+blood                                                                                                                                                                                                                                                                                                             |
| 48 | 3    | Transporters enriched in salivary gland not in stomach                                                | 5     | 12.1     | 1    | protein_class:Transporters+AND+tissue_category_rna:Salivary+gland;Tissue+enriched+AND+tissue_category_rna:Stomach;Not+detected                                                                                                                                                                                                                                                                                          |
| 49 | 3    | Kinases enriched in bone marrow not in liver                                                          | 0     | 13.2     | 1    | protein_class:Enzymes;Kinases+AND+tissue_category_rna:Bone+marrow;Tissue+enriched+AND+tissue_category_rna:Liver;Not+detected                                                                                                                                                                                                                                                                                            |
| 50 | 3    | CD markers enriched in thymus not in bone marrow                                                      | 9     | 12.1     | 1    | protein_class:CD+markers+AND+tissue_category_rna:Lymphoid;tissue;Tissue+enriched+AND+tissue_category_rna:Bone+marrow;Not+detected                                                                                                                                                                                                                                                                                       |
| 51 | 3    | Transcription factors enriched in retina not in liver                                                 | 6     | 12.3     | 1    | protein_class:Transcription+factors+AND+tissue_category_rna:Retina;Tissue+enriched+AND+tissue_category_rna:Liver;Not+detected                                                                                                                                                                                                                                                                                           |
| 52 | 3    | Membrane proteins enriched in tongue not in esophagus                                                 | 1     | 15.3     | 1    | protein_class:Predicted+membrane+proteins+AND+tissue_category_rna:Tongue;Tissue+enriched+NOT+tissue_category_rna:Esophagus;Tissue+enriched                                                                                                                                                                                                                                                                              |
| 53 | 4    | Predicted secreted proteins enriched in stomach secreted to digestive system                          | 12    | 38.5     | 2    | protein_class:Predicted+secreted+proteins+AND+tissue_category_rna:Stomach;Tissue+enriched+AND+sa_location:Secreted+to+digestive+system+NOT+tissue_category_rna:Adipose+tissue;Adrenal+gland;Bone+marrow;Breast;Cervix;Endometrium;Epididymis;Esophagus;Fallopian+tube;Gallbladder;Intestine;Kidney;Liver;Lung;Lymphoid+tissue;Ovary;Pancreas;Parathyroid+gland;Pituitary+gland;Placenta;Prostate;Retina;Tissue+enriched |
| 54 | 3    | Kinases enriched in smooth muscle not in heart                                                        | 0     | 12.4     | 1    | protein_class:Enzymes;Kinases+AND+tissue_category_rna:Smooth+muscle;Tissue+enriched+NOT+tissue_category_rna:Heart+muscle;Tissue+enriched                                                                                                                                                                                                                                                                                |
| 55 | 3    | Transporters enriched in rectum not in colon                                                          | 0     | 25.9     | 2    | protein_class:Transporters+AND+normal_expression:Rectum;glandular+cells+NOT+ce_enriched:Colon;Colon+enterocytes;Colon+enteroendocrine+cells;Mitotic+cells+(Colon)                                                                                                                                                                                                                                                       |
| 56 | 3    | Nuclear receptors enriched in adrenal gland not secreted to blood                                     | 0     | 12.1     | 1    | protein_class:Nuclear+receptors+AND+tissue_category_rna:Adrenal+gland;Tissue+enriched+NOT+sa_location:Secreted+to+blood                                                                                                                                                                                                                                                                                                 |
| 57 | 3    | Cancer-related genes enriched in prostate not in testis                                               | 8     | 13.0     | 1    | protein_class:Cancer-related+genes+AND+tissue_category_rna:Prostate;Tissue+enriched+NOT+tissue_category_rna:Testis;Tissue+enriched                                                                                                                                                                                                                                                                                      |
| 58 | 4    | Metabolic enzymes enriched in kidney not secreted to blood                                            | 4     | 15.1     | 1    | protein_class:Enzymes+AND+protein_class:Metabolic+proteins+AND+tissue_category_rna:Kidney;Tissue+enriched+NOT+sa_location:Secreted+to+blood                                                                                                                                                                                                                                                                             |
| 59 | 3    | Peptidases enriched in duodenum not in stomach                                                        | 2     | 14.0     | 1    | protein_class:Enzymes;Peptidases+AND+tissue_category_rna:Intestine;Tissue+enriched+AND+tissue_category_rna:Stomach;Not+detected                                                                                                                                                                                                                                                                                         |
| 60 | 3    | Plasma proteins enriched in spleen not in liver                                                       | 7     | 12.3     | 1    | protein_class:Plasma+proteins+AND+tissue_category_rna:Lymphoid;tissue;Tissue+enriched+AND+tissue_category_rna:Liver;Not+detected                                                                                                                                                                                                                                                                                        |

| #  | AXES | QUERY                                                              | GENES | TIME (s) | ATT. | URL                                                                                                                                                                                                              |
|----|------|--------------------------------------------------------------------|-------|----------|------|------------------------------------------------------------------------------------------------------------------------------------------------------------------------------------------------------------------|
| 61 | 3    | FDA drug targets enriched in lung not in kidney                    | 1     | 13.1     | 1    | protein_class:FDA+approved+drug+targets+AND+tissue_category_rna:Lung;Tissue+enriched+AND+tissue_category_rna:Kidney;Not+detected                                                                                 |
| 62 | 3    | Predicted membrane proteins enriched in thyroid gland not in liver | 5     | 12.9     | 1    | protein_class:Predicted+membrane+proteins+AND+tissue_category_rna:Thyroid+gland;Tissue+enriched+NOT+tissue_category_rna:Liver;Tissue+enriched                                                                    |
| 63 | 3    | Transcription factors enriched in ovary not in testis              | 1     | 11.1     | 1    | protein_class:Transcription+factors+AND+tissue_category_rna:Ovary;Tissue+enriched+NOT+tissue_category_rna:Testis;Tissue+enriched                                                                                 |
| 64 | 4    | CD markers enriched in appendix not in spleen                      | 0     | 40.5     | 2    | protein_class:CD+markers+AND+normal_expression:Appendix;lymphoid+tissue+NOT+ce_enriched:Spleen;B-cells+(Spleen);Mitotic+cells+(Spleen);NK-cells+(Spleen)+NOT+tissue_category_rna:Lymphoid+tissue;Tissue+enriched |
| 65 | 3    | Enzymes enriched in parathyroid gland not in thyroid gland         | 3     | 11.4     | 1    | protein_class:Enzymes+AND+tissue_category_rna:Parathyroid+gland;Tissue+enriched+NOT+tissue_category_rna:Thyroid+gland;Tissue+enriched                                                                            |
| 66 | 3    | Ribosomal proteins enriched in spleen not in liver                 | 0     | 12.9     | 1    | protein_class:Ribosomal+proteins+AND+tissue_category_rna:Lymphoid+tissue;Tissue+enriched+NOT+tissue_category_rna:Liver;Tissue+enriched                                                                           |
| 67 | 3    | Transporters enriched in placenta not secreted to blood            | 4     | 11.4     | 1    | protein_class:Transporters+AND+tissue_category_rna:Placenta;Tissue+enriched+NOT+sa_location:Secreted+to+blood                                                                                                    |
| 68 | 4    | Cancer-related enzymes enriched in brain not in liver              | 1     | 13.7     | 1    | protein_class:Enzymes+AND+protein_class:Cancer-related+genes+AND+tissue_category_rna:Brain;Tissue+enriched+AND+tissue_category_rna:Liver;Not+detected                                                            |
| 69 | 3    | Hepatocyte enriched kinases secreted to blood                      | 0     | 14.2     | 1    | protein_class:Enzymes;Kinases+AND+cell_type_category_rna:Hepatocytes;Cell+type+enriched+AND+sa_location:Secreted+to+blood                                                                                        |
| 70 | 3    | Neuronal cell enriched transporters not detected in liver          | 34    | 12.1     | 1    | protein_class:Transporters+AND+cell_type_group_category_rna:Neuronal+cells;Cell+type+enriched+AND+tissue_category_rna:Liver;Not+detected                                                                         |
| 71 | 3    | Cardiomyocyte enriched enzymes not secreted to blood               | 3     | 13.2     | 1    | protein_class:Enzymes+AND+cell_type_category_rna:Cardiomyocytes;Cell+type+enriched+NOT+sa_location:Secreted+to+blood                                                                                             |
| 72 | 3    | T-cell enriched transcription factors not detected in brain        | 5     | 13.7     | 1    | protein_class:Transcription+factors+AND+immune_cell_lineage_category_rna:T-cells;Lineage+enriched+AND+tissue_category_rna:Brain;Not+detected                                                                     |
| 73 | 3    | B-cell enriched CD markers not detected in liver                   | 3     | 12.0     | 1    | protein_class:CD+markers+AND+cell_type_category_rna:B-cells;Cell+type+enriched+AND+tissue_category_rna:Liver;Not+detected                                                                                        |
| 74 | 2    | Spermatogenic cell enriched genes secreted to blood                | 9     | 12.3     | 1    | cell_type_group_category_rna:Spermatogenic+cell+types;Cell+type+enriched+AND+sa_location:Secreted+to+blood                                                                                                       |
| 75 | 3    | Glial cell enriched kinases not detected in liver                  | 1     | 12.5     | 1    | protein_class:Enzymes;Kinases+AND+cell_type_group_category_rna:Glial+cells;Cell+type+enriched+AND+tissue_category_rna:Liver;Not+detected                                                                         |
| 76 | 2    | Macrophage enriched genes enriched in spleen                       | 0     | 12.2     | 1    | cell_type_category_rna:Macrophages;Cell+type+enriched+AND+tissue_category_rna:Lymphoid+tissue;Tissue+enriched                                                                                                    |
| 77 | 3    | NK-cell enriched enzymes not detected in brain                     | 0     | 11.9     | 1    | protein_class:Enzymes+AND+cell_type_category_rna:NK-cells;Cell+type+enriched+AND+tissue_category_rna:Brain;Not+detected                                                                                          |
| 78 | 3    | Dendritic cell enriched CD markers not in liver                    | 6     | 12.3     | 1    | protein_class:CD+markers+AND+immune_cell_lineage_category_rna:Dendritic+cells;Lineage+enriched+AND+tissue_category_rna:Liver;Not+detected                                                                        |
| 79 | 3    | Oligodendrocyte enriched transporters not in kidney                | 1     | 13.1     | 1    | protein_class:Transporters+AND+cell_type_category_rna:Oligodendrocytes;Cell+type+enriched+AND+tissue_category_rna:Kidney;Not+detected                                                                            |
| 80 | 2    | Fibroblast enriched predicted secreted proteins                    | 5     | 11.9     | 1    | protein_class:Predicted+secreted+proteins+AND+cell_type_category_rna:Fibroblasts;Cell+type+enriched                                                                                                              |
| 81 | 3    | Smooth muscle cell enriched membrane proteins not in brain         | 0     | 13.7     | 1    | protein_class:Predicted+membrane+proteins+AND+cell_type_category_rna:Smooth+muscle+cells;Cell+type+enriched+AND+tissue_category_rna:Brain;Not+detected                                                           |
| 82 | 2    | Goblet cell enriched proteins not in liver                         | 12    | 11.6     | 1    | cell_type_group_category_rna:Goblet+cells;Cell+type+enriched+AND+tissue_category_rna:Liver;Not+detected                                                                                                          |
| 83 | 2    | Leydig cell enriched genes not secreted to blood                   | 0     | 11.2     | 1    | cell_type_category_rna:Leydig+cells;Cell+type+enriched+NOT+sa_location:Secreted+to+blood                                                                                                                         |
| 84 | 3    | Kupffer cell enriched enzymes enriched in liver                    | 0     | 10.6     | 1    | protein_class:Enzymes+AND+ce_enriched:Liver;Kupffer+cells+AND+tissue_category_rna:Liver;Tissue+enriched                                                                                                          |
| 85 | 3    | Sertoli cell enriched transcription factors not in brain           | 0     | 12.0     | 1    | protein_class:Transcription+factors+AND+cell_type_category_rna:Sertoli+cells;Cell+type+enriched+AND+tissue_category_rna:Brain;Not+detected                                                                       |
| 86 | 3    | Melanocyte enriched genes not in liver or kidney                   | 4     | 15.2     | 1    | cell_type_category_rna:Melanocytes;Cell+type+enriched+AND+tissue_category_rna:Liver;Not+detected+AND+tissue_category_rna:Kidney;Not+detected                                                                     |
| 87 | 3    | Astrocyte enriched kinases not detected in liver                   | 0     | 15.9     | 1    | protein_class:Enzymes;Kinases+AND+cell_type_category_rna:Astrocytes;Cell+type+enriched+AND+tissue_category_rna:Liver;Not+detected                                                                                |
| 88 | 3    | Endothelial cell enriched transporters not secreted to blood       | 0     | 11.5     | 1    | protein_class:Transporters+AND+cell_type_category_rna:Endothelial+cells;Cell+type+enriched+NOT+sa_location:Secreted+to+blood                                                                                     |
| 89 | 3    | Trophoblast enriched genes not detected in brain or liver          | 4     | 12.7     | 1    | cell_type_category_rna:Extravillous+trophoblasts;Cell+type+enriched+AND+tissue_category_rna:Brain;Not+detected+AND+tissue_category_rna:Liver;Not+detected                                                        |
| 90 | 2    | Mural cell enriched predicted membrane proteins                    | 2     | 11.1     | 1    | protein_class:Predicted+membrane+proteins+AND+cell_type_group_category_rna:Mural+cells;Cell+type+enriched                                                                                                        |
| 91 | 3    | Platelet enriched enzymes not in liver                             | 0     | 11.9     | 1    | cell_type_group_category_rna:Platelets;Cell+type+enriched+AND+tissue_category_rna:Liver;Not+detected+AND+protein_class:Enzymes                                                                                   |
| 92 | 2    | Basal cell enriched transcription factors                          | 0     | 10.1     | 1    | protein_class:Transcription+factors+AND+cell_type_group_category_rna:Basal+cells;Cell+type+enriched                                                                                                              |
| 93 | 3    | Renal nephron cell enriched transporters not secreted to blood     | 24    | 15.8     | 1    | protein_class:Transporters+AND+cell_type_group_category_rna:Renal+nephron+cells;Cell+type+enriched+NOT+sa_location:Secreted+to+blood                                                                             |
| 94 | 3    | Proliferating cell enriched kinases not in brain                   | 0     | 12.7     | 1    | protein_class:Enzymes;Kinases+AND+cell_type_group_category_rna:Proliferating+cells;Cell+type+enriched+AND+tissue_category_rna:Brain;Not+detected                                                                 |
| 95 | 2    | Secretory cell enriched predicted secreted proteins                | 0     | 11.2     | 1    | protein_class:Predicted+secreted+proteins+AND+cell_type_category_rna:Secretory+cells;Cell+type+enriched                                                                                                          |
| 96 | 2    | Luminal cell enriched genes not detected in liver                  | 3     | 12.0     | 1    | cell_type_group_category_rna:Luminal+cells;Cell+type+enriched+AND+tissue_category_rna:Liver;Not+detected                                                                                                         |
| 97 | 3    | Acinar cell enriched enzymes not secreted to blood                 | 19    | 11.8     | 1    | protein_class:Enzymes+AND+cell_type_group_category_rna:Acinar+cells;Cell+type+enriched+NOT+sa_location:Secreted+to+blood                                                                                         |
| 98 | 3    | Stromal cell enriched transcription factors not in brain           | 2     | 12.5     | 1    | protein_class:Transcription+factors+AND+cell_type_group_category_rna:Stromal+cells;Cell+type+enriched+AND+tissue_category_rna:Brain;Not+detected                                                                 |
| 99 | 2    | Pancreatic endocrine cell enriched transporters                    | 0     | 10.3     | 1    | protein_class:Transporters+AND+cell_type_category_rna:Pancreatic+endocrine+cells;Cell+type+enriched                                                                                                              |

| #   | AXES | QUERY                                                                                          | GENES | TIME (S) | ATT. | URL                                                                                                                                                                                         |
|-----|------|------------------------------------------------------------------------------------------------|-------|----------|------|---------------------------------------------------------------------------------------------------------------------------------------------------------------------------------------------|
| 100 | 3    | Enterocyte enriched enzymes not in liver                                                       | 7     | 13.1     | 1    | protein_class:Enzymes+AND+cell_type_group_category_rna:Enterocytes;Cell+type+enriched+AND+tissue_category_rna:Liver;Not+detected                                                            |
| 101 | 3    | Alveolar cell enriched predicted secreted proteins not secreted to blood                       | 9     | 11.5     | 1    | protein_class:Predicted+secreted+proteins+AND+cell_type_group_category_rna:Alveolar+cells;Cell+type+enriched+NOT+sa_location:Secreted+to+blood                                              |
| 102 | 2    | Squamous epithelial cell enriched genes not in liver                                           | 0     | 10.9     | 1    | cell_type_category_rna:Squamous+epithelial+cells;Cell+type+enriched+AND+tissue_category_rna:Liver;Not+detected                                                                              |
| 103 | 2    | Ciliated cell enriched proteins not in brain                                                   | 0     | 11.0     | 1    | cell_type_category_rna:Ciliated+cells;Cell+type+enriched+AND+tissue_category_rna:Brain;Not+detected                                                                                         |
| 104 | 2    | Early spermatid enriched genes not in ovary                                                    | 21    | 11.7     | 1    | cell_type_category_rna:Early+spermatids;Cell+type+enriched+AND+tissue_category_rna:Ovary;Not+detected                                                                                       |
| 105 | 3    | Erythroid cell enriched transporters not in liver                                              | 0     | 12.5     | 1    | protein_class:Transporters+AND+cell_type_category_rna:Erythroid+cells;Cell+type+enriched+AND+tissue_category_rna:Liver;Not+detected                                                         |
| 106 | 2    | Ionocyte enriched genes not in kidney                                                          | 0     | 11.6     | 1    | cell_type_category_rna:Ionocytes;Cell+type+enriched+AND+tissue_category_rna:Kidney;Not+detected                                                                                             |
| 107 | 3    | Langerhans cell enriched CD markers not in brain                                               | 0     | 11.4     | 1    | protein_class:CD+markers+AND+cell_type_category_rna:Langerhans+cells;Cell+type+enriched+AND+tissue_category_rna:Brain;Not+detected                                                          |
| 108 | 3    | Kinases enriched in basal ganglia not in cerebellum                                            | 0     | 11.9     | 1    | protein_class:Enzymes;Kinases+AND+brain_category_rna:Basal+ganglia;Region+enriched+AND+brain_category_rna:Cerebellum;Not+detected                                                           |
| 109 | 3    | Transporters enriched in thalamus not in cerebral cortex                                       | 0     | 10.8     | 1    | protein_class:Transporters+AND+brain_category_rna:Thalamus;Region+enriched+AND+brain_category_rna:Cerebral+cortex;Not+detected                                                              |
| 110 | 3    | Enzymes enriched in hypothalamus not secreted to blood                                         | 1     | 13.4     | 1    | protein_class:Enzymes+AND+brain_category_rna:Hypothalamus;Region+enriched+NOT+sa_location:Secreted+to+blood                                                                                 |
| 111 | 3    | Transcription factors enriched in choroid plexus not in cerebral cortex                        | 3     | 12.6     | 1    | protein_class:Transcription+factors+AND+tissue_category_rna:Choroid+plexus;Tissue+enriched+NOT+brain_category_rna:Cerebral+cortex;Region+enriched                                           |
| 112 | 2    | Predicted secreted proteins enriched in pituitary gland                                        | 12    | 9.8      | 1    | protein_class:Predicted+secreted+proteins+AND+tissue_category_rna:Pituitary+gland;Tissue+enriched                                                                                           |
| 113 | 2    | Nuclear receptors enriched in hippocampal formation                                            | 0     | 9.2      | 1    | protein_class:Nuclear+receptors+AND+brain_category_rna:Hippocampal+formation;Region+enriched                                                                                                |
| 114 | 3    | CD markers expressed in cerebellum not in cerebral cortex                                      | 5     | 12.1     | 1    | protein_class:CD+markers+AND+brain_category_rna:Cerebellum;Detected+in+all;Detected+in+many;Detected+in+some;Detected+in+single+AND+brain_category_rna:Cerebral+cortex;Not+detected         |
| 115 | 2    | Cancer-related genes enriched in pons                                                          | 0     | 10.5     | 1    | protein_class:Cancer+related+genes+AND+brain_category_rna:Pons;Region+enriched                                                                                                              |
| 116 | 3    | Membrane proteins enriched in white matter not in cerebral cortex                              | 0     | 13.8     | 1    | protein_class:Predicted+membrane+proteins+AND+brain_category_rna:White+matter;Region+enriched+NOT+brain_category_rna:Cerebral+cortex;Region+enriched                                        |
| 117 | 3    | Kinases enriched in olfactory bulb not in cerebral cortex                                      | 0     | 13.5     | 1    | protein_class:Enzymes;Kinases+AND+mouse_brain_category_rna:Olfactory+bulb;Region+enriched+AND+brain_category_rna:Cerebral+cortex;Not+detected                                               |
| 118 | 3    | Enzymes enriched in substantia nigra not in cerebellum                                         | 0     | 12.3     | 1    | protein_class:Enzymes+AND+normal_expression:Substantia+nigra;neuronals+cells+AND+brain_category_rna:Cerebellum;Not+detected                                                                 |
| 119 | 3    | Transporters enriched in caudate nucleus not in cerebral cortex                                | 0     | 12.2     | 1    | protein_class:Transporters+AND+brain_category_rna:Basal+ganglia;Region+enriched+AND+brain_category_rna:Cerebral+cortex;Not+detected                                                         |
| 120 | 3    | Transcription factors enriched in putamen not in cerebral cortex                               | 1     | 12.0     | 1    | protein_class:Transcription+factors+AND+brain_category_rna:Basal+ganglia;Region+enriched+NOT+brain_category_rna:Cerebral+cortex;Region+enriched                                             |
| 121 | 3    | Predicted membrane proteins enriched in spinal cord not in cerebral cortex                     | 0     | 10.7     | 1    | protein_class:Predicted+membrane+proteins+AND+brain_category_rna:Spinal+cord;Region+enriched+NOT+brain_category_rna:Cerebral+cortex;Region+enriched                                         |
| 122 | 3    | Ribosomal proteins enriched in retina not in cerebral cortex                                   | 0     | 10.7     | 1    | protein_class:Ribosomal+proteins+AND+tissue_category_rna:Retina;Tissue+enriched+AND+brain_category_rna:Cerebral+cortex;Not+detected                                                         |
| 123 | 3    | Plasma proteins expressed in choroid plexus secreted to blood                                  | 238   | 12.5     | 1    | protein_class:Plasma+proteins+AND+tissue_category_rna:Choroid+plexus;Detected+in+all;Detected+in+many;Detected+in+some;Detected+in+single+AND+sa_location:Secreted+to+blood                 |
| 124 | 3    | FDA drug targets enriched in cerebellum not in cerebral cortex                                 | 6     | 12.5     | 1    | protein_class:FDA+approved+drug+targets+AND+brain_category_rna:Cerebellum;Region+enriched+NOT+brain_category_rna:Cerebral+cortex;Region+enriched                                            |
| 125 | 3    | Kinases enriched in amygdala not in hippocampal formation                                      | 0     | 13.5     | 1    | protein_class:Enzymes;Kinases+AND+brain_category_rna:Amygdala;Region+enriched+NOT+brain_category_rna:Hippocampal+formation;Region+enriched                                                  |
| 126 | 4    | Enzymes enriched in hypothalamus not in thalamus and not in cerebral cortex                    | 0     | 13.5     | 1    | protein_class:Enzymes+AND+brain_category_rna:Hypothalamus;Region+enriched+AND+brain_category_rna:Thalamus;Not+detected+AND+brain_category_rna:Cerebral+cortex;Not+detected                  |
| 127 | 3    | Transporters enriched in medulla oblongata not in pons                                         | 0     | 10.7     | 1    | protein_class:Transporters+AND+brain_category_rna:Medulla+oblongata;Region+enriched+NOT+brain_category_rna:Pons;Region+enriched                                                             |
| 128 | 3    | Cancer-related kinases enriched in cerebral cortex                                             | 0     | 13.3     | 1    | protein_class:Enzymes;Kinases+AND+protein_class:Cancer+related+genes+AND+brain_category_rna:Cerebral+cortex;Region+enriched                                                                 |
| 129 | 3    | Predicted secreted proteins enriched in pituitary gland secreted to blood                      | 9     | 12.8     | 1    | protein_class:Predicted+secreted+proteins+AND+tissue_category_rna:Pituitary+gland;Tissue+enriched+AND+sa_location:Secreted+to+blood                                                         |
| 130 | 3    | Nuclear receptors enriched in hypothalamus not in cerebral cortex                              | 3     | 12.8     | 1    | protein_class:Nuclear+receptors+AND+brain_category_rna:Hypothalamus;Region+enriched+NOT+brain_category_rna:Cerebral+cortex;Region+enriched                                                  |
| 131 | 2    | Membrane proteins enriched in globus pallidus                                                  | 5     | 12.2     | 1    | protein_class:Predicted+membrane+proteins+AND+brain_category_rna:Basal+ganglia;Region+enriched                                                                                              |
| 132 | 4    | Metabolic enzymes enriched in cerebellum not in cerebral cortex                                | 6     | 13.5     | 1    | protein_class:Enzymes+AND+protein_class:Metabolic+proteins+AND+brain_category_rna:Cerebellum;Region+enriched+NOT+brain_category_rna:Cerebral+cortex;Region+enriched                         |
| 133 | 3    | Transcription factors enriched in hippocampal formation not in amygdala                        | 0     | 10.9     | 1    | protein_class:Transcription+factors+AND+brain_category_rna:Hippocampal+formation;Region+enriched+AND+brain_category_rna:Amygdala;Not+detected                                               |
| 134 | 4    | Kinases enriched in thalamus not in hypothalamus and not in cerebral cortex                    | 0     | 14.2     | 1    | protein_class:Enzymes;Kinases+AND+brain_category_rna:Thalamus;Region+enriched+NOT+brain_category_rna:Hypothalamus;Region+enriched+NOT+brain_category_rna:Cerebral+cortex;Region+enriched    |
| 135 | 4    | Enzymes enriched in spinal cord not in cerebral cortex and not in cerebellum                   | 0     | 13.3     | 1    | protein_class:Enzymes+AND+brain_category_rna:Spinal+cord;Region+enriched+NOT+brain_category_rna:Cerebral+cortex;Region+enriched+NOT+brain_category_rna:Cerebellum;Region+enriched           |
| 136 | 3    | Transporters enriched in midbrain not in cerebral cortex                                       | 4     | 11.4     | 1    | protein_class:Transporters+AND+brain_category_rna:Midbrain;Region+enriched+AND+brain_category_rna:Cerebral+cortex;Not+detected                                                              |
| 137 | 3    | CD markers expressed in pons not in cerebellum                                                 | 33    | 14.1     | 1    | protein_class:CD+markers+AND+brain_category_rna:Pons;Detected+in+all;Detected+in+many;Detected+in+some;Detected+in+single+AND+brain_category_rna:Cerebellum;Not+detected                    |
| 138 | 4    | Transcription factors enriched in caudate nucleus not in cerebral cortex and not in cerebellum | 1     | 15.9     | 1    | protein_class:Transcription+factors+AND+brain_category_rna:Basal+ganglia;Region+enriched+AND+brain_category_rna:Cerebral+cortex;Not+detected+AND+brain_category_rna:Cerebellum;Not+detected |
| 139 | 3    | Predicted membrane proteins enriched in choroid plexus not in cerebral cortex                  | 14    | 12.0     | 1    | protein_class:Predicted+membrane+proteins+AND+tissue_category_rna:Choroid+plexus;Tissue+enriched+NOT+brain_category_rna:Cerebral+cortex;Region+enriched                                     |

| #   | AXES | QUERY                                                                             | GENES | TIME (S) | ATT. | URL                                                                                                                                                                                                         |
|-----|------|-----------------------------------------------------------------------------------|-------|----------|------|-------------------------------------------------------------------------------------------------------------------------------------------------------------------------------------------------------------|
| 140 | 4    | Kinases enriched in white matter not in cerebral cortex and not secreted to blood | 0     | 13.5     | 1    | protein_class:Enzymes+Kinases+AND+brain_category_rna:White+matter:Region+enriched+AND+brain_category_rna:Cerebral+cortex:Not+detected+NOT+sa_location:Secreted+to+blood                                     |
| 141 | 3    | Nuclear receptors expressed in amygdala not in liver                              | 10    | 15.0     | 1    | protein_class:Nuclear+receptors+AND+brain_category_rna:Amygdala:Detected+in+all:Detected+in+many:Detected+in+some:Detected+in+single+AND+tissue_category_rna:Liver:Not+detected                             |
| 142 | 4    | Enzymes enriched in olfactory bulb not in cerebral cortex and not in liver        | 4     | 14.0     | 1    | protein_class:Enzymes+AND+mouse_brain_category_rna:Olfactory+bulb:Region+enriched+AND+brain_category_rna:Cerebral+cortex:Not+detected+AND+tissue_category_rna:Liver:Not+detected                            |
| 143 | 3    | Metabolic proteins enriched in pituitary gland not in liver                       | 0     | 10.9     | 1    | protein_class:Metabolic+proteins+AND+tissue_category_rna:Pituitary+gland:Tissue+enriched+NOT+tissue_category_rna:Liver:Tissue+enriched                                                                      |
| 144 | 4    | Ribosomal proteins enriched in cerebellum not in cerebral cortex and not in liver | 0     | 15.4     | 1    | protein_class:Ribosomal+proteins+AND+brain_category_rna:Cerebellum:Region+enriched+NOT+brain_category_rna:Cerebral+cortex:Region+enriched+NOT+tissue_category_rna:Liver:Tissue+enriched                     |
| 145 | 4    | Cancer-related enzymes enriched in cerebral cortex not in liver                   | 1     | 13.8     | 1    | protein_class:Enzymes+AND+protein_class:Cancer+related+genes+AND+brain_category_rna:Cerebral+cortex:Region+enriched+NOT+tissue_category_rna:Liver:Tissue+enriched                                           |
| 146 | 1    | Prognostic markers in melanoma                                                    | 254   | 11.2     | 1    | prognostic:Skin+Cutaneous+Melanoma:Favorable+potential+prognostic:Favorable+validated+prognostic:Unfavorable+potential+prognostic:Unfavorable+validated+prognostic                                          |
| 147 | 1    | Prognostic markers in liver cancer                                                | 4360  | 14.4     | 1    | prognostic:Liver+Hepatocellular+Carcinoma:Favorable+potential+prognostic:Favorable+validated+prognostic:Unfavorable+potential+prognostic:Unfavorable+validated+prognostic                                   |
| 148 | 1    | Prognostic markers in lung cancer                                                 | 2623  | 11.9     | 1    | prognostic:Lung+Squamous+Cell+Carcinoma,Lung+Adenocarcinoma:Favorable+potential+prognostic:Favorable+validated+prognostic:Unfavorable+potential+prognostic:Unfavorable+validated+prognostic                 |
| 149 | 1    | Prognostic markers in colorectal cancer                                           | 608   | 11.1     | 1    | prognostic:Colon+Adenocarcinoma:Favorable+potential+prognostic:Favorable+validated+prognostic:Unfavorable+potential+prognostic:Unfavorable+validated+prognostic                                             |
| 150 | 1    | Prognostic markers in endometrial cancer                                          | 221   | 11.9     | 1    | prognostic:Uterine+Corpus+Endometrial+Carcinoma:Favorable+potential+prognostic:Favorable+validated+prognostic:Unfavorable+potential+prognostic:Unfavorable+validated+prognostic                             |
| 151 | 1    | Prognostic markers in head and neck cancer                                        | 872   | 12.1     | 1    | prognostic:Head+and+Neck+Squamous+Cell+Carcinoma:Favorable+potential+prognostic:Favorable+validated+prognostic:Unfavorable+potential+prognostic:Unfavorable+validated+prognostic                            |
| 152 | 1    | Prognostic markers in urothelial cancer                                           | 510   | 11.3     | 1    | prognostic:Bladder+Urothelial+Carcinoma:Favorable+potential+prognostic:Favorable+validated+prognostic:Unfavorable+potential+prognostic:Unfavorable+validated+prognostic                                     |
| 153 | 1    | Prognostic markers in cervical cancer                                             | 887   | 15.8     | 1    | prognostic:Cervical+Squamous+Cell+Carcinoma+and+Endocervical+Adenocarcinoma:Favorable+potential+prognostic:Favorable+validated+prognostic:Unfavorable+potential+prognostic:Unfavorable+validated+prognostic |
| 154 | 1    | Prognostic markers in testis cancer                                               | 24    | 12.8     | 1    | prognostic:Testicular+Germ+Cell+Tumor:Favorable+potential+prognostic:Favorable+validated+prognostic:Unfavorable+potential+prognostic:Unfavorable+validated+prognostic                                       |
| 155 | 3    | Cancer-related kinases not secreted to blood                                      | 123   | 11.4     | 1    | protein_class:Enzymes+Kinases+AND+protein_class:Cancer+related+genes+NOT+sa_location:Secreted+to+blood                                                                                                      |
| 156 | 3    | Cancer-related transcription factors enriched in brain                            | 4     | 12.3     | 1    | protein_class:Transcription+factors+AND+protein_class:Cancer+related+genes+AND+tissue_category_rna:Brain:Tissue+enriched                                                                                    |
| 157 | 4    | Cancer-related enzymes enriched in liver secreted to blood                        | 7     | 12.0     | 1    | protein_class:Enzymes+AND+protein_class:Cancer+related+genes+AND+tissue_category_rna:Liver:Tissue+enriched+AND+sa_location:Secreted+to+blood                                                                |
| 158 | 3    | Cancer-related CD markers enriched in bone marrow                                 | 2     | 12.1     | 1    | protein_class:CD+markers+AND+protein_class:Cancer+related+genes+AND+tissue_category_rna:Bone+marrow:Tissue+enriched                                                                                         |
| 159 | 3    | Cancer-related membrane proteins enriched in kidney                               | 0     | 12.1     | 1    | protein_class:Predicted+membrane+proteins+AND+protein_class:Cancer+related+genes+AND+tissue_category_rna:Kidney:Tissue+enriched                                                                             |
| 160 | 3    | Cancer-related plasma proteins secreted to blood                                  | 164   | 12.0     | 1    | protein_class:Plasma+proteins+AND+protein_class:Cancer+related+genes+AND+sa_location:Secreted+to+blood                                                                                                      |
| 161 | 4    | Cancer-related transporters enriched in brain not in liver                        | 3     | 13.9     | 1    | protein_class:Transporters+AND+protein_class:Cancer+related+genes+AND+tissue_category_rna:Brain:Tissue+enriched+NOT+tissue_category_rna:Liver:Tissue+enriched                                               |
| 162 | 3    | Cancer-related nuclear receptors enriched in prostate                             | 0     | 11.2     | 1    | protein_class:Nuclear+receptors+AND+protein_class:Cancer+related+genes+AND+tissue_category_rna:Prostate:Tissue+enriched                                                                                     |
| 163 | 3    | Cancer-related ribosomal proteins enriched in testis                              | 0     | 11.2     | 1    | protein_class:Ribosomal+proteins+AND+protein_class:Cancer+related+genes+AND+tissue_category_rna:Testis:Tissue+enriched                                                                                      |
| 164 | 4    | Cancer-related proteases enriched in stomach not in liver                         | 1     | 14.8     | 1    | protein_class:Enzymes+Peptidases+AND+protein_class:Cancer+related+genes+AND+tissue_category_rna:Stomach:Tissue+enriched+NOT+tissue_category_rna:Liver:Tissue+enriched                                       |
| 165 | 3    | Cancer-related FDA drug targets enriched in brain                                 | 4     | 11.6     | 1    | protein_class:FDA+approved+drug+targets+AND+protein_class:Cancer+related+genes+AND+tissue_category_rna:Brain:Tissue+enriched                                                                                |
| 166 | 4    | Cancer-related metabolic proteins enriched in liver not in kidney                 | 7     | 12.1     | 1    | protein_class:Metabolic+proteins+AND+protein_class:Cancer+related+genes+AND+tissue_category_rna:Liver:Tissue+enriched+AND+tissue_category_rna:Kidney:Not+detected                                           |
| 167 | 3    | Cancer-related voltage-gated ion channels enriched in brain                       | 0     | 12.6     | 1    | protein_class:Voltage-gated+ion+channels+AND+protein_class:Cancer+related+genes+AND+tissue_category_rna:Brain:Tissue+enriched                                                                               |
| 168 | 3    | Disease related kinases enriched in liver                                         | 0     | 11.7     | 1    | protein_class:Enzymes+Kinases+AND+protein_class:Disease+related+genes+AND+tissue_category_rna:Liver:Tissue+enriched                                                                                         |
| 169 | 3    | Disease related enzymes not secreted to blood                                     | 1325  | 12.8     | 1    | protein_class:Enzymes+AND+protein_class:Disease+related+genes+NOT+sa_location:Secreted+to+blood                                                                                                             |
| 170 | 4    | Disease related transporters enriched in kidney not in liver                      | 8     | 12.9     | 1    | protein_class:Transporters+AND+protein_class:Disease+related+genes+AND+tissue_category_rna:Kidney:Tissue+enriched+AND+tissue_category_rna:Liver:Not+detected                                                |
| 171 | 3    | Disease related membrane proteins enriched in brain                               | 60    | 12.8     | 1    | protein_class:Predicted+membrane+proteins+AND+protein_class:Disease+related+genes+AND+tissue_category_rna:Brain:Tissue+enriched                                                                             |
| 172 | 3    | Disease related predicted secreted proteins enriched in placenta                  | 8     | 11.6     | 1    | protein_class:Disease+related+genes+AND+protein_class:Predicted+secreted+proteins+AND+tissue_category_rna:Placenta:Tissue+enriched                                                                          |
| 173 | 4    | Disease related transcription factors enriched in testis not in ovary             | 2     | 13.9     | 1    | protein_class:Transcription+factors+AND+protein_class:Disease+related+genes+AND+tissue_category_rna:Testis:Tissue+enriched+NOT+tissue_category_rna:Ovary:Tissue+enriched+Group+enriched                     |
| 174 | 4    | FDA approved kinases enriched in brain not in liver                               | 2     | 14.8     | 1    | protein_class:Enzymes+Kinases+AND+protein_class:FDA+approved+drug+targets+AND+tissue_category_rna:Brain:Tissue+enriched+NOT+tissue_category_rna:Liver:Tissue+enriched                                       |
| 175 | 3    | FDA approved enzymes enriched in liver                                            | 24    | 11.8     | 1    | protein_class:Enzymes+AND+protein_class:FDA+approved+drug+targets+AND+tissue_category_rna:Liver:Tissue+enriched                                                                                             |
| 176 | 4    | FDA approved transporters enriched in kidney not in liver                         | 9     | 13.8     | 1    | protein_class:Transporters+AND+protein_class:FDA+approved+drug+targets+AND+tissue_category_rna:Kidney:Tissue+enriched+NOT+tissue_category_rna:Liver:Tissue+enriched                                         |
| 177 | 4    | FDA approved membrane proteins enriched in brain not secreted to blood            | 40    | 14.9     | 1    | protein_class:Predicted+membrane+proteins+AND+protein_class:FDA+approved+drug+targets+AND+tissue_category_rna:Brain:Tissue+enriched+NOT+sa_location:Secreted+to+blood                                       |
| 178 | 3    | FDA approved nuclear receptors enriched in prostate                               | 0     | 10.7     | 1    | protein_class:Nuclear+receptors+AND+protein_class:FDA+approved+drug+targets+AND+tissue_category_rna:Prostate:Tissue+enriched                                                                                |
| 179 | 3    | Nuclear proteins enriched in testis not in liver                                  | 188   | 27.8     | 2    | subcell_location:Nucleoplasm+AND+tissue_category_rna:Testis:Tissue+enriched+NOT+tissue_category_rna:Liver:Tissue+enriched                                                                                   |
| 180 | 3    | Cytosol proteins enriched in liver not secreted to blood                          | 21    | 12.8     | 1    | subcell_location:Cytosol(Main+location)+AND+tissue_category_rna:Liver:Tissue+enriched+NOT+sa_location:Secreted+to+blood                                                                                     |

| #   | AXES | QUERY                                                                                | GENES | TIME (S) | ATT. | URL                                                                                                                                                                                                                                                                                    |
|-----|------|--------------------------------------------------------------------------------------|-------|----------|------|----------------------------------------------------------------------------------------------------------------------------------------------------------------------------------------------------------------------------------------------------------------------------------------|
| 181 | 3    | Endoplasmic reticulum proteins enriched in pancreas not in liver                     | 6     | 12.3     | 1    | subcell_locationEndoplasmic+reticulum+AND+tissue_category_rnaPancreas;Tissue+enriched+NOT+tissue_category_rnaLiver;Tissue+enriched                                                                                                                                                     |
| 182 | 3    | Golgi apparatus proteins enriched in kidney not secreted to blood                    | 1     | 15.1     | 1    | subcell_locationGolgi+apparatus+AND+tissue_category_rnaKidney;Tissue+enriched+NOT+sa_locationSecreted+to+blood                                                                                                                                                                         |
| 183 | 3    | Centrosome proteins enriched in testis not in brain                                  | 14    | 12.1     | 1    | subcell_locationCentrosome+AND+tissue_category_rnaTestis;Tissue+enriched+AND+tissue_category_rnaBrain;Not+detected                                                                                                                                                                     |
| 184 | 3    | Vesicle proteins enriched in brain not in liver                                      | 43    | 22.9     | 2    | subcell_locationVesicles+AND+tissue_category_rnaBrain;Tissue+enriched+AND+tissue_category_rnaLiver;Not+detected                                                                                                                                                                        |
| 185 | 3    | Actin filament proteins enriched in heart muscle not in skeletal muscle              | 1     | 14.4     | 1    | subcell_locationActin+filaments+AND+tissue_category_rnaHeart+muscle;Tissue+enriched+NOT+tissue_category_rnaSkeletal+muscle;Tissue+enriched+Group+enriched                                                                                                                              |
| 186 | 3    | Intermediate filament proteins enriched in skin not in liver                         | 3     | 11.9     | 1    | subcell_locationIntermediate+filaments+AND+tissue_category_rnaSkin;Tissue+enriched+AND+tissue_category_rnaLiver;Not+detected                                                                                                                                                           |
| 187 | 3    | Focal adhesion proteins enriched in placenta not in brain                            | 0     | 14.1     | 1    | subcell_locationFocal+adhesion+sites+AND+tissue_category_rnaPlacenta;Tissue+enriched+NOT+tissue_category_rnaBrain;Tissue+enriched                                                                                                                                                      |
| 188 | 3    | Peroxisome proteins enriched in liver not in kidney                                  | 0     | 13.4     | 1    | subcell_locationPeroxisomes+AND+tissue_category_rnaLiver;Tissue+enriched+AND+tissue_category_rnaKidney;Not+detected                                                                                                                                                                    |
| 189 | 3    | Lysosome proteins enriched in spleen not in brain                                    | 0     | 12.0     | 1    | subcell_locationLysosomes+AND+tissue_category_rnaLymphoid+tissue;Tissue+enriched+AND+tissue_category_rnaBrain;Not+detected                                                                                                                                                             |
| 190 | 3    | Cell junction proteins enriched in colon not in liver                                | 1     | 13.2     | 1    | subcell_locationCell+Junctions+AND+tissue_category_rnaIntestine;Tissue+enriched+AND+tissue_category_rnaLiver;Not+detected                                                                                                                                                              |
| 191 | 3    | Nucleolus proteins enriched in testis not in brain                                   | 38    | 13.4     | 1    | subcell_locationNucleoli+AND+tissue_category_rnaTestis;Tissue+enriched+AND+tissue_category_rnaBrain;Not+detected                                                                                                                                                                       |
| 192 | 3    | Lipid droplet proteins enriched in liver not in brain                                | 0     | 12.3     | 1    | subcell_locationLipid+droplets+AND+tissue_category_rnaLiver;Tissue+enriched+AND+tissue_category_rnaBrain;Not+detected                                                                                                                                                                  |
| 193 | 2    | Centriolar satellite proteins enriched in testis                                     | 4     | 11.0     | 1    | subcell_locationCentriolar+satellite+AND+tissue_category_rnaTestis;Tissue+enriched                                                                                                                                                                                                     |
| 194 | 3    | Nuclear speckle proteins enriched in brain not in liver                              | 4     | 12.7     | 1    | subcell_locationNuclear+speckles+AND+tissue_category_rnaBrain;Tissue+enriched+AND+tissue_category_rnaLiver;Not+detected                                                                                                                                                                |
| 195 | 3    | Cytoplasmic body proteins enriched in liver not in brain                             | 0     | 11.7     | 1    | subcell_locationCytoplasmic+bodies+AND+tissue_category_rnaLiver;Tissue+enriched+AND+tissue_category_rnaBrain;Not+detected                                                                                                                                                              |
| 196 | 4    | Nuclear membrane proteins enriched in testis not in ovary                            | 0     | 13.4     | 1    | protein_classPredicted+membrane+proteins+AND+subcell_locationNuclear+membrane+AND+tissue_category_rnaTestis;Tissue+enriched+NOT+tissue_category_rnaOvary;Tissue+enriched                                                                                                               |
| 197 | 2    | Kinetochore proteins enriched in bone marrow                                         | 0     | 12.1     | 1    | subcell_locationKinetochore+AND+tissue_category_rnaBone+marrow;Tissue+enriched                                                                                                                                                                                                         |
| 198 | 2    | Rods and rings proteins enriched in liver                                            | 1     | 11.0     | 1    | subcell_locationRods+%26+Rings+AND+tissue_category_rnaLiver;Tissue+enriched                                                                                                                                                                                                            |
| 199 | 3    | What kinases are found in the retina but not in any other brain region               | 7     | 13.0     | 1    | protein_classEnzymes;Kinases+AND+tissue_category_rnaRetina;Tissue+enriched+NOT+brain_category_rnaCerebral+cortex;Cerebellum;Hippocampal+formation;Amygdala;Basal+ganglia;Choroid+plexus;Hypothalamus;Medulla+oblongata;Midbrain;Pons;Spinal+cord;Thalamus;White+matter;Region+enriched |
| 200 | 3    | Show me enzymes that are specific to the adrenal gland and not found in kidney       | 4     | 12.0     | 1    | protein_classEnzymes+AND+tissue_category_rnaAdrenal+gland;Tissue+enriched+AND+tissue_category_rnaKidney;Not+detected                                                                                                                                                                   |
| 201 | 2    | Which transporters are enriched in both the colon and small intestine                | 25    | 15.7     | 1    | protein_classTransporters+AND+tissue_category_rnaIntestine;Tissue+enriched                                                                                                                                                                                                             |
| 202 | 3    | Find all nuclear receptors that are expressed in the brain but not secreted to blood | 37    | 12.8     | 1    | protein_classNuclear+receptors+AND+tissue_category_rnaBrain;Detected+in+all;Detected+in+many;Detected+in+some;Detected+in+single+NOT+sa_locationSecreted+to+blood                                                                                                                      |
| 203 | 2    | What proteins are specific to placenta and also secreted to blood                    | 10    | 11.3     | 1    | tissue_category_rnaPlacenta;Tissue+enriched+AND+sa_locationSecreted+to+blood                                                                                                                                                                                                           |
| 204 | 2    | Give me transcription factors found in testis but nowhere else                       | 33    | 13.6     | 1    | protein_classTranscription+factors+AND+tissue_category_rnaTestis;Tissue+enriched                                                                                                                                                                                                       |
| 205 | 3    | Which cancer-related genes are enriched in liver and secreted to blood               | 35    | 23.8     | 2    | protein_classCancer+related+genes+AND+tissue_category_rnaLiver;Tissue+enriched+AND+sa_locationSecreted+to+blood                                                                                                                                                                        |
| 206 | 3    | Show me all mitochondrial kinases enriched in heart                                  | 0     | 12.7     | 1    | protein_classEnzymes;Kinases+AND+subcell_locationMitochondria+AND+tissue_category_rnaHeart+muscle;Tissue+enriched                                                                                                                                                                      |
| 207 | 4    | Find CD markers enriched in T-cells but not in B-cells or NK-cells                   | 25    | 16.1     | 1    | protein_classCD+markers+AND+immune_cell_lineage_category_rnaT+cells;Lineage+enriched+NOT+immune_cell_lineage_category_rnaB+cells;Lineage+enriched+NOT+immune_cell_lineage_category_rnaNK+cells;Lineage+enriched                                                                        |
| 208 | 4    | What enzymes are enriched in stomach but completely absent from liver and pancreas   | 1     | 14.0     | 1    | protein_classEnzymes+AND+tissue_category_rnaStomach;Tissue+enriched+AND+tissue_category_rnaLiver;Not+detected+AND+tissue_category_rnaPancreas;Not+detected                                                                                                                             |
| 209 | 4    | Show me predicted membrane proteins found in brain but not heart or kidney           | 558   | 15.6     | 1    | protein_classPredicted+membrane+proteins+AND+tissue_category_rnaBrain;Detected+in+all;Detected+in+many;Detected+in+some;Detected+in+single+AND+tissue_category_rnaHeart+muscle;Not+detected+AND+tissue_category_rnaKidney;Not+detected                                                 |
| 210 | 4    | Which FDA drug targets are in the kidney but not in the liver or brain               | 6     | 14.0     | 1    | protein_classFDA+approved+drug+targets+AND+tissue_category_rnaKidney;Tissue+enriched+NOT+tissue_category_rnaLiver;Detected+in+all;Detected+in+many;Detected+in+some+NOT+tissue_category_rnaBrain;Detected+in+all;Detected+in+many;Detected+in+some                                     |
| 211 | 3    | Find all transporters that are brain-specific and not secreted                       | 87    | 22.8     | 2    | protein_classTransporters+AND+tissue_category_rnaBrain;Tissue+enriched+NOT+predicted_locationPredicted+secreted+proteins                                                                                                                                                               |
| 212 | 3    | What ribosomal proteins are found in bone marrow but not in the brain                | 1     | 12.1     | 1    | protein_classRibosomal+proteins+AND+tissue_category_rnaBone+marrow;Detected+in+all;Detected+in+many;Detected+in+some;Detected+in+single+AND+tissue_category_rnaBrain;Not+detected                                                                                                      |
| 213 | 3    | Which proteases are enriched in pancreas and secreted to the digestive system        | 14    | 11.4     | 1    | protein_classEnzymes;Peptidases+AND+tissue_category_rnaPancreas;Tissue+enriched+AND+sa_locationSecreted+to+digestive+system                                                                                                                                                            |
| 214 | 4    | Find kinases expressed in cerebellum but absent from cerebral cortex and liver       | 5     | 14.5     | 1    | protein_classEnzymes;Kinases+AND+brain_category_rnaCerebellum;Detected+in+all;Detected+in+many;Detected+in+some;Detected+in+single+AND+brain_category_rnaCerebral+cortex;Not+detected+AND+tissue_category_rnaLiver;Not+detected                                                        |
| 215 | 3    | What are the heart-specific membrane proteins not found in skeletal muscle           | 5     | 12.8     | 1    | protein_classPredicted+membrane+proteins+AND+tissue_category_rnaHeart+muscle;Tissue+enriched+AND+tissue_category_rnaSkeletal+muscle;Not+detected                                                                                                                                       |
| 216 | 3    | Which voltage-gated ion channels are brain enriched and not in heart                 | 20    | 12.1     | 1    | protein_classVoltage+gated+ion+channels+AND+tissue_category_rnaBrain;Tissue+enriched+NOT+tissue_category_rnaHeart+muscle;Tissue+enriched                                                                                                                                               |
| 217 | 2    | Find genes that are enriched in oligodendrocytes but not in astrocytes               | 31    | 11.3     | 1    | cell_type_category_rnaOligodendrocytes;Cell+type+enriched+NOT+cell_type_category_rnaAstrocytes;Cell+type+enriched                                                                                                                                                                      |
| 218 | 2    | What metabolic proteins are found only in the liver                                  | 107   | 10.8     | 1    | protein_classMetabolic+proteins+AND+tissue_category_rnaLiver;Tissue+enriched                                                                                                                                                                                                           |
| 219 | 3    | Show me all predicted secreted proteins enriched in breast not going to blood        | 6     | 11.3     | 1    | protein_classPredicted+secreted+proteins+AND+tissue_category_rnaBreast;Tissue+enriched+NOT+sa_locationSecreted+to+blood                                                                                                                                                                |

| #   | AXES | QUERY                                                                                                         | GENES | TIME (s) | ATT. | URL                                                                                                                                                                                                                                                                                                                                                                                              |
|-----|------|---------------------------------------------------------------------------------------------------------------|-------|----------|------|--------------------------------------------------------------------------------------------------------------------------------------------------------------------------------------------------------------------------------------------------------------------------------------------------------------------------------------------------------------------------------------------------|
| 220 | 3    | Which transcription factors are specific to spermatogenic cells and not in brain                              | 24    | 12.2     | 1    | protein_class:Transcription+factors+AND+cell_type_group_category_rna:Spermatogenic+cell+types:Cell+type+enriched+AND+tissue_category_rna:Brain+Not+detected                                                                                                                                                                                                                                      |
| 221 | 3    | Find plasma proteins enriched in the kidney that are not secreted to blood                                    | 4     | 11.1     | 1    | protein_class:Plasma+proteins+AND+tissue_category_rna:Kidney:Tissue+enriched+NOT+sa_location:Secreted+to+blood                                                                                                                                                                                                                                                                                   |
| 222 | 3    | What enzymes are in the thyroid but not in the parathyroid                                                    | 307   | 13.7     | 1    | protein_class:Enzymes+AND+tissue_category_rna:Thyroid:gland+Detected+in+all+Detected+in+many+Detected+in+some+Detected+in+single+NOT+tissue_category_rna:Parathyroid:gland+Detected+in+all+Detected+in+many+Detected+in+some+Detected+in+single                                                                                                                                                  |
| 223 | 2    | Show me all RAS pathway related genes enriched in brain                                                       | 13    | 11.9     | 1    | protein_class:RAS+pathway+related+proteins+AND+tissue_category_rna:Brain:Tissue+enriched                                                                                                                                                                                                                                                                                                         |
| 224 | 3    | Which immunoglobulin genes are enriched in bone marrow and secreted to blood                                  | 0     | 12.2     | 1    | protein_class:Immunoglobulin+genes+AND+tissue_category_rna:Bone+marrow:Tissue+enriched+AND+sa_location:Secreted+to+blood                                                                                                                                                                                                                                                                         |
| 225 | 3    | Find cardiomyocyte enriched kinases not found in any other tissue                                             | 1     | 14.2     | 1    | protein_class:Enzymes:Kinases+AND+cell_type_category_rna:Cardiomyocytes:Cell+type+enriched+NOT+tissue_category_rna:Adipose+tissue:Adrenal:gland+Bone+marrow,Brain,Breast,Cervix,Choroid+plexus,Endometrium,Epididymis,Esophagus,Fallopian+tube,Gallbladder,Intestine,Kidney,Liver,Lung,Lymphoid+tissue,Ovary,Pancreas,Parathyroid:gland,Pituitary:gland,Placenta,Prostate,Retina:Tissue+enriched |
| 226 | 2    | What proteins are enriched in pituitary gland and secreted to blood                                           | 9     | 10.5     | 1    | tissue_category_rna:Pituitary:gland:Tissue+enriched+AND+sa_location:Secreted+to+blood                                                                                                                                                                                                                                                                                                            |
| 227 | 6    | Kinases enriched in brain not in liver not in heart not in kidney and not secreted to blood                   | 4     | 14.9     | 1    | protein_class:Enzymes:Kinases+AND+tissue_category_rna:Brain:Tissue+enriched+AND+tissue_category_rna:Liver:Not+detected+AND+tissue_category_rna:Heart+muscle:Not+detected+AND+tissue_category_rna:Kidney:Not+detected+NOT+sa_location:Secreted+to+blood                                                                                                                                           |
| 228 | 6    | Enzymes enriched in liver not in pancreas not in stomach not in kidney and not in brain                       | 24    | 13.9     | 1    | protein_class:Enzymes+AND+tissue_category_rna:Liver:Tissue+enriched+AND+tissue_category_rna:Pancreas:Not+detected+AND+tissue_category_rna:Stomach:Not+detected+AND+tissue_category_rna:Kidney:Not+detected+AND+tissue_category_rna:Brain:Not+detected                                                                                                                                            |
| 229 | 6    | Transcription factors enriched in testis not in ovary not in brain not in liver and not in prostate           | 24    | 13.9     | 1    | protein_class:Transcription+factors+AND+tissue_category_rna:Testis:Tissue+enriched+AND+tissue_category_rna:Ovary:Not+detected+AND+tissue_category_rna:Brain:Not+detected+AND+tissue_category_rna:Liver:Not+detected+AND+tissue_category_rna:Prostate:Not+detected                                                                                                                                |
| 230 | 6    | Transporters enriched in kidney not in liver not in brain not in heart and not secreted to blood              | 16    | 20.0     | 1    | protein_class:Transporters+AND+tissue_category_rna:Kidney:Tissue+enriched+AND+tissue_category_rna:Liver:Not+detected+AND+tissue_category_rna:Brain:Not+detected+AND+tissue_category_rna:Heart+muscle:Not+detected+NOT+sa_location:Secreted+to+blood                                                                                                                                              |
| 231 | 6    | CD markers enriched in bone marrow not in brain not in liver not in testis and not in kidney                  | 7     | 16.2     | 1    | protein_class:CD+markers+AND+tissue_category_rna:Bone+marrow:Tissue+enriched+AND+tissue_category_rna:Brain:Not+detected+AND+tissue_category_rna:Liver:Not+detected+AND+tissue_category_rna:Testis:Not+detected+AND+tissue_category_rna:Kidney:Not+detected                                                                                                                                       |
| 232 | 6    | Predicted secreted proteins enriched in placenta not in liver not in brain not in ovary and secreted to blood | 5     | 17.6     | 1    | protein_class:Predicted+secreted+proteins+AND+tissue_category_rna:Placenta:Tissue+enriched+AND+tissue_category_rna:Liver:Not+detected+AND+tissue_category_rna:Brain:Not+detected+AND+tissue_category_rna:Ovary:Not+detected+AND+sa_location:Secreted+to+blood                                                                                                                                    |
| 233 | 6    | Cancer-related kinases enriched in brain not in liver not in kidney and not secreted to blood                 | 0     | 16.2     | 1    | protein_class:Enzymes:Kinases+AND+protein_class:Cancer-related+genes+AND+tissue_category_rna:Brain:Tissue+enriched+AND+tissue_category_rna:Liver:Not+detected+AND+tissue_category_rna:Kidney:Not+detected+NOT+sa_location:Secreted+to+blood                                                                                                                                                      |
| 234 | 5    | Hepatocyte enriched enzymes not in brain not in kidney and not secreted to blood                              | 14    | 16.0     | 1    | protein_class:Enzymes+AND+cell_type_category_rna:Hepatocytes:Cell+type+enriched+AND+tissue_category_rna:Brain:Not+detected+AND+tissue_category_rna:Kidney:Not+detected+NOT+sa_location:Secreted+to+blood                                                                                                                                                                                         |
| 235 | 5    | Neuronal cell enriched kinases not in liver not in kidney and not secreted to blood                           | 5     | 15.6     | 1    | protein_class:Enzymes:Kinases+AND+cell_type_group_category_rna:Neuronal+cells:Cell+type+enriched+AND+tissue_category_rna:Liver:Not+detected+AND+tissue_category_rna:Kidney:Not+detected+NOT+sa_location:Secreted+to+blood                                                                                                                                                                        |
| 236 | 6    | FDA drug targets enriched in brain not in liver not in kidney not in heart and not secreted to blood          | 31    | 15.2     | 1    | protein_class:FDA+approved+drug+targets+AND+tissue_category_rna:Brain:Tissue+enriched+AND+tissue_category_rna:Liver:Not+detected+AND+tissue_category_rna:Kidney:Not+detected+AND+tissue_category_rna:Heart+muscle:Not+detected+NOT+sa_location:Secreted+to+blood                                                                                                                                 |
